# Supplementary material
Source: PubMed Central journal article supplement (PMC4548816)
Supplement: NIHMS708010-supplement-Supp_TableS1.pdf [file NIHMS708010-supplement-Supp_TableS1.pdf]

Table S1. Procedures and comorbidities of the cohort.

|                                         | N      | (%)    |
|-----------------------------------------|--------|--------|
|                                         | 66,105 | (100)  |
| <i>Preoperative albumin</i>             |        |        |
| <3.5                                    | 2148   | (3.3)  |
| 3.5-4                                   | 9234   | (14.0) |
| >4                                      | 13,086 | (19.8) |
| Unknown                                 | 41,637 | (63.0) |
| <i>Indication for surgery</i>           |        |        |
| Leiomyoma                               | 17,746 | (26.9) |
| Endometriosis                           | 3619   | (5.5)  |
| Abnormal bleeding                       | 12,955 | (19.6) |
| Benign neoplasm                         | 2535   | (3.8)  |
| Pelvic organ prolapse                   | 7893   | (11.9) |
| Uterine cancer                          | 6683   | (10.1) |
| Cervical cancer                         | 869    | (1.3)  |
| Ovarian cancer                          | 1626   | (2.5)  |
| <i>Concomitant procedures</i>           |        |        |
| Anterior colporrhaphy                   | 4045   | (6.1)  |
| Posterior colporrhaphy                  | 3405   | (5.2)  |
| Incontinence repair                     | 3700   | (5.6)  |
| Sacral colpopexy                        | 1869   | (2.8)  |
| Sacrospinous fixation                   | 774    | (1.2)  |
| Lymphadenectomy                         | 4045   | (6.1)  |
| <i>Preoperative conditions</i>          |        |        |
| Non insulin dependent diabetes mellitus | 3439   | (5.2)  |
| Insulin dependent diabetes mellitus     | 1392   | (2.1)  |
| Tobacco use                             | 11,825 | (17.9) |
| Chronic obstructive pulmonary disease   | 850    | (1.3)  |
| Congestive heart failure                | 63     | (0.1)  |
| Hypertension                            | 19,793 | (29.9) |
| Metastatic cancer                       | 838    | (1.3)  |
| Corticosteroid use                      | 732    | (1.1)  |
| Weight loss                             | 301    | (0.5)  |
| Bleeding disorder                       | 744    | (1.1)  |
| Preoperative transfusion                | 488    | (0.7)  |
| <i>Postoperative conditions</i>         |        |        |
| Reoperation                             | 1045   | (1.6)  |
| Superficial surgical site infection     | 1051   | (1.6)  |
| Deep surgical site infection            | 219    | (0.3)  |
| Organ space surgical site infection     | 617    | (0.9)  |
| Any wound infection                     | 1862   | (2.8)  |
| Dehiscence                              | 235    | (0.4)  |
| Pneumonia                               | 207    | (0.3)  |
| Pulmonary embolism                      | 217    | (0.3)  |
| Deep vein thrombosis                    | 171    | (0.3)  |
| Urinary tract infection                 | 1842   | (2.8)  |
| Transfusion                             | 2742   | (4.2)  |
| Sepsis                                  | 439    | (0.7)  |
| Shock                                   | 78     | (0.1)  |
| Myocardial infarction                   | 42     | (0.1)  |
| Acute renal failure                     | 30     | (0.1)  |
| Readmission                             | 1719   | (2.6)  |

Procedures >1% included
